1 **RNAi gene knockdown in the poultry red mite, *Dermanyssus gallinae* (De Geer**  
2 **1778), a tool for functional genomics**

3

4

5 Wan Chen<sup>1,2</sup>, Kathryn Bartley<sup>1</sup>, Francesca Nunn<sup>1</sup>, Alan S. Bowman<sup>2</sup>, Jeremy M.  
6 Sternberg<sup>2</sup>, Stewart T. G. Burgess<sup>1</sup>, Alasdair J. Nisbet<sup>1</sup>, Daniel R. G. Price<sup>1#</sup>

7

8

9 <sup>1</sup>Moredun Research Institute, Pentlands Science Park, Edinburgh EH26 0PZ, United  
10 Kingdom

11 <sup>2</sup>Institute of Biological and Environmental Sciences, School of Biological Sciences,  
12 University of Aberdeen, Aberdeen AB24 3FX, United Kingdom

13

14 #Correspondence: [Daniel.Price@moredun.ac.uk](mailto:Daniel.Price@moredun.ac.uk)

15

16 Moredun Research Institute

17 Pentlands Science Park

18 Bush Loan

19 Penicuik

20 Midlothian, EH26 0PZ

21 Tel: +44 (0)131 445 5111

22 Fax: +44 (0)131 445 6111

23

24

25

## 26 **Abstract**

27 **Background:** The avian haematophagous ectoparasite, *Dermanyssus gallinae* or the  
28 poultry red mite, causes significant economic losses to the egg laying industry  
29 worldwide and also represents a significant welfare threat. Current acaricide-based  
30 controls are unsustainable due to the mite's ability to rapidly develop resistance, thus  
31 developing a novel sustainable means of control for *D. gallinae* is a priority. RNA  
32 interference (RNAi) mediated gene silencing is a valuable tool for studying gene  
33 function in non-model organisms, but is also emerging as a novel tool for parasite  
34 control.

35

36 **Methods:** Here we use an *in silico* approach to identify core RNAi pathway genes in  
37 the recently sequenced *D. gallinae* genome. In addition we utilise an *in vitro* feeding  
38 device to deliver dsRNA to *D. gallinae* targeting the *D. gallinae vATPase subunit A*  
39 (*Dg vATPase A*) gene and monitor gene knockdown using quantitative PCR (qPCR).

40

41 **Results:** We identified core components of the small interfering RNA (siRNA) and  
42 micro RNA (miRNA) pathways in *D. gallinae*, which indicate these gene silencing  
43 pathways are likely functional. Strikingly, the Piwi-interacting RNA (piRNA) pathway  
44 was absent in *D. gallinae*. In addition, we demonstrate that feeding *Dg vATPase A*  
45 dsRNA to adult female *D. gallinae* results in silencing of the targeted gene compared  
46 to control mites fed non-specific *lacZ* dsRNA. In *D. gallinae*, dsRNA mediated gene  
47 knockdown is rapid, detectable 24 hours after oral delivery of dsRNA and persisted for  
48 at least 120 hours.

49

50 **Conclusions:** This study has shown the presence of core RNAi machinery  
51 components in the *D. gallinae* genome. In addition, we have developed a robust RNAi  
52 methodology for targeting genes in *D. gallinae*, which will be of value for studying  
53 genes of unknown function and validating potential control targets in *D. gallinae*.

54

### 55 **Keywords**

56 RNA interference; poultry red mite; functional genomics; gene silencing; gene  
57 knockdown

58

### 59 **Background**

60 Poultry red mite (*Dermanyssus gallinae* (De Geer, 1778)), is an avian  
61 haematophagous ectoparasite with a worldwide distribution and a prevalence of 83%  
62 in European hen egg laying facilities (1). There are five life cycle stages in *D. gallinae*:  
63 egg, larvae, protonymph, deutonymph, and adult; and blood feeding is only a feature  
64 of the latter three stages (2, 3). This parasite lives off-host in the cracks and crevices  
65 in the hen facilities and only emerges to bite the host in darkness for a bloodmeal,  
66 which takes around 30 to 90 min during which each mite consumes ~200 µg of blood  
67 per feed (3, 4). Thus, in severe infestations where each laying hen may be infested  
68 with up to 500,000 mites, infestation can lead to multiple behavioural and physiological  
69 changes in the birds, such as restlessness, irritation, anaemia, feather pecking,  
70 cannibalism, and increased mortality rates (5, 6). Also, *D. gallinae* has been reported  
71 as the vector for a number of bacterial and viral diseases of birds as well as zoonotic  
72 agents (7, 8). Apart from the hen welfare issues caused by *D. gallinae*, it also increases  
73 the operational expenditure for hen egg production through losses in feed conversion  
74 ratio, downgrading of eggs and decreased egg output (6, 9, 10). Overall, the estimated

75 annual cost of *D. gallinae* (production loss plus costs of control) was estimated as €231  
76 million in Europe in 2017 (6). Conventional control of *D. gallinae* is through the use of  
77 chemical acaricide treatments of poultry houses or through systemic acaricides  
78 administered via drinking water (11). However, with the increased incidence of  
79 resistance against some acaricides (12) and concerns over residues in food, multiple  
80 chemical treatments have been withdrawn from use in the EU (2).

81 Development of novel strategies for control of *D. gallinae* is a priority and gene  
82 target identification for development of novel control approaches is facilitated by the  
83 recent publication of transcriptomes and the genome of *D. gallinae* (13, 14). One key  
84 tool for exploiting these genomic and transcriptomic resources for novel target  
85 identification is transcriptional silencing. Since the discovery of RNA interference  
86 (RNAi) as a tool for silencing gene expression in the free living nematode,  
87 *Caenorhabditis elegans* (15), its application has been widened into various fields  
88 including novel arthropod control strategies (16, 17). Irrespective of the organism in  
89 which transcriptional silencing is to be investigated, two essential components are  
90 required for successful RNAi: 1) the presence of a functional RNAi pathway and 2) an  
91 appropriate delivery method for the gene-specific double-stranded RNA (dsRNA) to  
92 initiate the silencing process. RNAi pathways are present in many of the mite species  
93 investigated to date (reviewed in (18)) and, for several species, delivery of dsRNA has  
94 been achieved through soaking mites in solutions containing the dsRNA (e.g. see (19,  
95 20)). While the immersion method of dsRNA delivery has also caused gene  
96 knockdown in *D. gallinae* (21), high mortality rates were observed, thus hampering  
97 interpretation of transcriptional silencing data and necessitating the development of a  
98 better approach of dsRNA administration to *D. gallinae*.

99           Here, we use the recently published *D. gallinae* genome (13) and associated  
100 transcriptomic data to describe the RNAi pathway in *D. gallinae* and also investigate  
101 an optimised delivery method to ascertain the optimal properties of the dsRNA for  
102 RNAi in this species. RNAi mediated gene silencing was investigated in adult female  
103 *D. gallinae* mites by targetting *D. gallinae vacuolar ATPase subunit A (Dg vATPase*  
104 *A)*, which has previously been targeted in arthropods, including the two spotted spider  
105 mite, *Tetranychus urticae* (22).

106

## 107 **Methods**

### 108 **Ethics approval**

109 All procedures to gather samples from animals were approved by the Moredun Animal  
110 Welfare and Ethical Review Body (AWERB) and were conducted under the legislation  
111 of a UK Home Office License (reference PPL 60/03899) in accordance with the  
112 Animals (Scientific Procedures) Act of 1986.

113

### 114 **RNAi Pathway Gene Annotation**

115 Core RNAi pathway components were identified in the *D. gallinae* genome by  
116 sequence similarity to RNAi pathway genes from *Drosophila melanogaster*. Twelve  
117 core RNAi pathway genes were selected from *D. melanogaster* that included  
118 Argonaute proteins, RNaseIII proteins and dsRNA binding proteins. Core *D.*  
119 *melanogaster* RNAi components were selected to represent three RNAi pathways,  
120 including: miRNA pathway (*argonaute1, Dicer 1, loquacious, Drosha, Pasha, Exportin-*  
121 *5*); siRNA pathway (*Argonaute2, Dicer 2, R2D2*) and piRNA pathway (*Aubergine, Piwi,*  
122 *Argonaute3*). Amino acid sequences for all twelve *D. melanogaster* RNAi pathway  
123 components were retrieved from Flybase (23) and used as query for blastp searches

124 against predicted peptides from the *D. gallinae* genome (13). Identified *D. gallinae*  
125 RNAi components were considered sequence orthologues for a given RNAi pathway  
126 component when they met the criteria of reciprocal best hit and included one-one and  
127 one-many sequence orthologues. Functional domains were identified in retrieved *D.*  
128 *gallinae* sequences using Pfam sequence searches (24).

129

### 130 **Phylogenetic analysis**

131 For phylogenetic analysis selected argonaute-like protein sequences were aligned  
132 using MUSCLE (25). Short sequences (<50% of the protein's consensus length) and  
133 predicted non-functional sequences due to absence of either PAZ domain (PF02170)  
134 or Piwi domain (PF02171) were removed from the alignment. All sequences used for  
135 phylogenetic reconstruction are shown in Additional file 1: Table S1. Ambiguously  
136 aligned positions were excluded by trimAL v1.2 (26) and a maximum-likelihood (ML)  
137 phylogenetic tree was constructed in MEGA 10.1.8 (27) using a LG+G substitution  
138 model. Statistical tree robustness was assessed using bootstrap analysis (1000  
139 bootstrap replicates).

140

### 141 **Amplification of *D. gallinae* vATPase A gene for RNAi validation.**

142 The full-length sequence of *D. gallinae* vacuolar ATPase subunit A (*Dg vATPase A*:  
143 DEGAL4806g00010) was retrieved from the OrcAE database for *D. gallinae* (13, 28).  
144 To validate the OrcAE gene model, *Dg vATPase A* (DEGAL4806g00010) was used in  
145 a blastx search against NCBI nr protein database and sequences with high similarity  
146 were retrieved from: *Varroa destructor* (XP\_022670783 and XP\_022670784);  
147 *Tropilaelaps mercedesae* (OQR76956); *Galendromus occidentalis* (XP\_003741079)  
148 and *Ixodes scapularis* (XP\_029849202). All sequences were aligned using MUSCLE

149 (25) and primers were designed based on conserved regions across *Dg vATPase A*  
150 and all other aligned sequences. The clustalx alignment and region used for primer  
151 design is shown in Additional file 2: Fig S1. The full-length coding sequence of *Dg*  
152 *vATPase A* was amplified using female *D. gallinae* cDNA as template and verified by  
153 Sanger sequencing.

154

### 155 **dsRNA Synthesis**

156 Region 1 (R1: 495 bp, corresponding to exon 4 – 7) and Region 2 (R2: 385 bp,  
157 corresponding to exon 8) of the *Dg vATPase A* gene were amplified from cDNA  
158 generated from adult female *D. gallinae* using Phusion proof-reading polymerase  
159 (Thermo Fisher Scientific, Waltham, MA, USA). Each forward and reverse primer  
160 contained an NcoI and NheI restriction enzyme site, respectively, to allow directional  
161 cloning into the RNAi vector pL4440 (pL4440 was a gift from Andrew Fire [Addgene  
162 plasmid # 1654; <http://n2t.net/addgene:1654> ; RRID:Addgene\_1654]). Primer  
163 sequences are shown in Additional file 3: Table S2. Amplification products for *Dg*  
164 *vATPase A* R1 (495 bp) and R2 (385 bp) were digested with NcoI and NheI and cloned  
165 into the corresponding restriction enzyme sites of pL4440. Plasmids were used to  
166 transform chemically competent *E. coli* JM109 cells (Promega, Madison, WI, USA)  
167 and plasmid was isolated *E. coli* transformants using a Wizard® Plus SV Minipreps  
168 DNA Purification System (Promega, Madison, WI, USA). Both RNAi constructs  
169 containing *Dg vATPase A* R1 and R2 were verified by Sanger sequencing. For control  
170 (non-target) dsRNA production we used a previously generated construct containing  
171 a region of the *E. coli* strain K-12 *lacZ* gene NC\_000913 (319bp; 63 – 381 bp of the  
172 CDS) cloned into SacI and SmaI sites of pL4440 (19). dsRNA was synthesized using  
173 the T7 RiboMAX Express RNAi System (Promega, Madison, WI, USA), according to

174 the manufacturer's instructions. For RNA synthesis *Dg vATPase A* pL4440 plasmids  
175 were linearized with either NcoI or NheI for sense or antisense transcription,  
176 respectively. Control *lacZ* pL4440 plasmid was linearized with SmaI or BglII for sense  
177 or antisense transcription, respectively. Purified dsRNA was quantified on a NanoDrop  
178 One spectrophotometer (Thermo Fisher Scientific, Waltham, MA, USA) and analysed  
179 by agarose/TAE gel electrophoresis to confirm quality and predicted size.

180

### 181 **siRNA Synthesis**

182 *Dg vATPase A* siRNAs were synthesised by either *in vitro* digestion of long dsRNAs  
183 (Method-1) or chemical synthesis of 27-mer blunt dsRNAs (Method-2). Method-1:  
184 Long dsRNAs for R1 and R2 of the *Dg vATPase A* gene and *lacZ* control gene (120  
185 µg of each dsRNA) were incubated with 0.2 units/µL ShortCut® RNase III (New  
186 England BioLabs, Ipswich, MA, USA) for 3 h at 37°C to produce a heterogeneous mix  
187 of short (18-25 bp) siRNA. Reactions were stopped with EDTA according to the  
188 manufacturer's protocol, ethanol-precipitated and the size-distribution of digested  
189 RNAs validated by electrophoresis using a 4% agarose gel. Method-2: Dicer-substrate  
190 siRNAs (27-mer blunt dsRNAs) were designed based on the coding sequence of the  
191 *Dg vATPase A* gene and *lacZ* control gene using the Eurofins Genomics siMAX siRNA  
192 design tool and commercially synthesized and annealed by Eurofins Genomics  
193 (Eurofins Genomics, Ebersberg, Germany). The sequence of each siRNA is shown in  
194 Additional file 4: Fig S2.

195

### 196 **RNAi Feeding Trials**

197 Mixed stage and mixed sex *D. gallinae* mites were collected from commercial egg-  
198 laying facilities and stored in vented 75 cm<sup>2</sup> tissue culture flasks (Corning Inc, Corning,



199 NY, USA) at room temperature for seven days, after which they were stored at 4°C for  
200 3 weeks without access to food. For oral delivery of dsRNA and siRNA to *D. gallinae*  
201 mites, approx. 100 mites were housed in an *in vitro* feeding device constructed as  
202 described previously (29). Each replicate feeding device contained 200 µl of freshly-  
203 collected heparinised goose blood (20 units/ml) with dsRNA at concentrations  
204 described in each experiment. For each dsRNA feeding experiment, biological  
205 replicates consisted of independent group of mites in replicate feeding devices (n = 3  
206 - 6 depending on experiment). Feeding devices were placed in a Sanyo MLR-351H  
207 relative humidity incubator for 3h at 39°C; 21h at 25°C both at 85% relative humidity.  
208 After 24 h, fed adult female mites were recovered from each replicate feeding device  
209 and transferred to separate labelled 1.5ml tubes, which were held at 25°C in dark  
210 conditions for the duration of the experiment. Mites from each replicate group were  
211 flash-frozen in liquid nitrogen at time-points indicated in each experiment and stored  
212 at -70°C for later RNA extraction.

213

#### 214 **Quantitative real-time PCR (qPCR) analysis**

215 Real-time quantitative polymerase chain reaction (qPCR) was used to quantify *Dg*  
216 *vATPase A* gene expression in adult female mites from RNAi feeding trials. Mites were  
217 homogenized with a tube pestle and total RNA was isolated using an RNeasy® plus  
218 micro kit (Qiagen, Hilden, Germany) which included a gDNA eliminator spin-column.  
219 Total RNA was quantified using a NanoDrop One (Thermo Fisher Scientific, Waltham,  
220 MA, USA) and first-strand cDNA synthesized using a QuantiTect® Reverse  
221 Transcription Kit (Qiagen, Hilden, Germany), according to the manufacturer's protocol.  
222 qPCR primers were designed using Primer3Plus (30), primer sequences are  
223 shown in Additional file 3: Table S2. Primers were checked for specificity by alignment

224 of *D. gallinae* target sequences with goose *Anser cygnoides v-ATPase A*  
225 (XM\_013196364) and *GAPDH* (XM\_013199522). In addition, qPCR products were  
226 sequenced demonstrating amplification of only *Dg vATPase A* and *D. gallinae*  
227 *GAPDH*. For construction of standard curves, qPCR primers were used to amplify *Dg*  
228 *vATPase A* (DEGAL4806g00010) and *GAPDH* (DEGAL4146g00090) from adult  
229 female *D. gallinae* cDNA. Amplification products were cloned into pJET1.2 (Thermo  
230 Fisher Scientific, Waltham, MA, USA) and verified by DNA sequencing. Plasmids were  
231 used in qPCR experiments to construct standard curves from  $10^2$ – $10^8$  copies of each  
232 gene. Ten microlitre qPCR reactions comprised 1× PowerUp SYBR green master mix  
233 (Thermo Fisher Scientific, Waltham, MA, USA), 500 nM of forward and reverse  
234 primers, and cDNA derived from 1 ng total RNA for each sample. PCR reactions were  
235 performed on an Applied Biosystems 7500 Real Time PCR System; thermal cycling  
236 conditions were 50°C for 2 min, 95°C for 2 min, followed by 40 cycles at 95°C for 15  
237 s, 58°C for 15 s, and 72 °C for 1 min. *Dg vATPase A* gene expression was normalized  
238 to housekeeping gene *GAPDH* and expression levels reported relative to control (*lacZ*)  
239 dsRNA fed mites. qPCR experiments were performed in triplicate and included no  
240 template controls and no reverse transcription controls with each run.

241

## 242 **Statistical analyses**

243 Analysis of *Dg vATPase A* gene expression levels in RNAi feeding trials were  
244 performed using GraphPad Prism version 8.0.0 for Windows (GraphPad Software, La  
245 Jolla, CA, USA). Datasets were analysed using either Student's *t-test* or one-way  
246 ANOVA with Dunnett's multiple comparison test (as indicated) and p-values of <0.05  
247 were considered significant.

248

## 249 **Results**

### 250 **miRNA and siRNA pathways are present in the *D. gallinae* genome**

251 We used a systematic search for core RNA interference (RNAi) genes involved in the  
252 siRNA pathway (*Argonaute2*, *Dicer 2*, *R2D2*); miRNA pathway (*argonaute1*, *Dicer 1*,  
253 *loquacious*, *Drosha*, *Pasha*, *Exportin-5*); and piRNA pathway (*Aubergine*, *Piwi*,  
254 *Argonaute3*) in *D. gallinae*. Our searches identified *D. gallinae* orthologues of at least  
255 one core gene in the siRNA and miRNA and pathways (See both Fig 1 and Table 1)  
256 and did not identify piRNA pathway orthologues, suggesting that this pathway is not  
257 present in *D. gallinae*.

258

### 259 **siRNA Pathway genes**

260 Of the three currently known core siRNA pathway genes from *Drosophila* (*Argonaute2*,  
261 *Dicer2* and *R2D2*), we identified an orthologue of *Dicer2* in *D. gallinae*  
262 (DEGAL2576g00010; [Table 1]) which is required to cleave and yield a mature siRNA.  
263 Domain analysis of *D. gallinae* Dcr-2 revealed a similar domain architecture to the  
264 well-characterised *Drosophila* Dcr-2, although the PAZ domain was absent in *D.*  
265 *gallinae* Dcr-2 (Additional file 5: Fig S3). Gene expression data available through  
266 OrcAE shows that *D. gallinae* Dcr-2 is universally expressed in adult male and female  
267 mites and all other life-stages. Our searches did not identify any other core siRNA  
268 pathway genes in *D. gallinae* and, while our searches identified a large Ago family  
269 (containing 25 members), it did not include a *D. gallinae* Ago2 orthologue.

270

### 271 **miRNA Pathway genes**

272 We identified orthologues of all six core miRNA pathway genes in *D. gallinae*.  
273 Identified *D. gallinae* miRNA pathway genes included: *Drosha* (DEGAL3563g00160;

274 [Table 1]) and *Pasha* (DEGAL6243g00040; [Table 1]) required for miRNA  
275 biosynthesis. *Exportin-5* (DEGAL4407g00370; [Table 1]) required for export of pre-  
276 miRNA from the nucleus to cytoplasm. *Dicer-1* (DEGAL4207g00210; [Table 1]) and  
277 two copies of its binding partner *Loquacious* (DEGAL6165g00020;  
278 DEGAL6165g00030; [Table 1]) required to cleave and yield a mature miRNA.  
279 *Argonaute-1* (DEGAL5747g00010; DEGAL5147g00020; [Table 1]) required to target  
280 and slice complementary RNA transcripts.

281 Domain analysis of *D. gallinae* Dcr-1 (Additional file 5: Fig S3) and *Argonaute-*  
282 *1* orthologues (Additional file 6: Fig S4.) demonstrate the presence of functional  
283 domains associated with activity. In addition, gene expression data available through  
284 OrcAE shows that all identified *D. gallinae* miRNA components are universally  
285 expressed in adult male and female mites and all other life-stages.

286

### 287 **Piwi and Ago2 proteins are absent in the *D. gallinae* genome**

288 *D. gallinae* Ago/Piwi coding sequences were identified based on similarity to two Ago  
289 proteins (Ago1 and Ago2) and three Piwi proteins (aub, piwi, Ago3) from *Drosophila*.  
290 All Ago/Piwi sequence orthologues identified in *D. gallinae* met the criteria of reciprocal  
291 best-hit in *D. gallinae* and *Drosophila* genomes. Using this search methodology we  
292 identified 25 Ago orthologues in the *D. gallinae* genome, while no Piwi orthologues  
293 were identified (Table 1). Additional searches were performed, using the same search  
294 criteria, with Ago/Piwi protein coding sequences from *T. urticae*, a related mite species  
295 with a high-quality annotated genome (31). These additional searches did not identify  
296 any additional Ago orthologues in *D. gallinae*, and again failed to identify any Piwi  
297 coding sequences.

298 All functional Ago proteins contain two common structural features: PAZ  
299 domain (responsible for small RNA binding) and Piwi domain (responsible for catalytic  
300 activities) (32). Therefore, in order to identify potential functional *D. gallinae* Ago  
301 proteins, all 25 *D. gallinae* Ago orthologues were analysed for domains using the Pfam  
302 database (24). These searches identified 16 *D. gallinae* Ago orthologues that  
303 contained both PAZ domain (Pfam, PF02170) and Piwi domain (Pfam, PF02171)  
304 (Additional file 6: Fig S4). In addition, all 16 *D. gallinae* Ago orthologues have a DEDH  
305 catalytic slicer motif within each Piwi domain indicating that these Agos likely retain  
306 slicer activity (33).

307 *D. gallinae* Ago orthologues with both PAZ and Piwi domains (a total of 16 *D.*  
308 *gallinae* Agos) were compared with orthologues from other arthropods including: the  
309 two-spotted spider mite, *T. urticae* (6 Ago orthologues and 7 Piwi orthologues) and  
310 insects (as detailed in Fig. 2). Our phylogenetic analysis identified two *D. gallinae* Ago1  
311 orthologues (DEGAL5147g00020; DEGAL5747g00010) likely to be involved in the  
312 miRNA pathway. The remaining *D. gallinae* Ago orthologues belong to two major  
313 clades, the first containing seven members and are closely related to Ago1 proteins  
314 (Fig. 2, Ago1-like clade). The second major clade contains seven members and is  
315 unique to *D. gallinae* (Fig. 2, Dg Ago clade). Members of the Dg Ago clade show  
316 evidence of duplication, with four members (DEGAL3253g00060;  
317 DEGAL3253g00070; DEGAL3253g00080; DEGAL3253g00100) present as a tandem  
318 array on the same genomic scaffold. Strikingly, none of the identified *D. gallinae* Agos  
319 belong to either the Ago2 clade or Piwi clade (Fig. 2).

320

321 **RNA-dependent RNA Polymerase (RdRP) is present in *D. gallinae* genome**

322 RNAi is a conserved gene silencing mechanism in eukaryotes. In non-animal  
323 eukaryotes RNAi mediated gene silencing requires RNA-dependent RNA polymerase  
324 (RdRP) proteins (34). However, in the animals investigated thus far, only *C. elegans*  
325 requires RdRP for RNAi mediated gene silencing (34). Using *C. elegans* RdRP protein  
326 sequence as a query in blastp search against *D. gallinae* we identified 9 RdRP  
327 orthologues in the *D. gallinae* genome, that meet the criteria of reciprocal best hit in  
328 *D. gallinae* and *C. elegans* genomes (Table 1). Based on gene expression data  
329 available through OrcAE, all 9 *D. gallinae* RdRP orthologues are expressed and  
330 therefore may play a role in amplification and propagation of silencing signals (Table  
331 1).

332

### 333 **Functional RNAi gene silencing in *D. gallinae***

334 Two regions of the *Dg vATPase A* gene were selected for synthesis of dsRNA. Region  
335 1 (R1: 495 bp, corresponding to exon 4 – 7) and Region 2 (R2: 385 bp, corresponding  
336 to exon 8) were used for *in vitro* synthesis of dsRNA (Fig. 3). dsRNAs were  
337 incorporated into goose blood, which was delivered to adult female *D. gallinae* mites  
338 using an *in vitro* feeding device. After feeding, engorged mites were selected based  
339 on a visible blood meal contained within the abdomen and were used for gene  
340 expression analysis. Mites with no visible signs of feeding were discarded and not  
341 used for expression analyses. Feeding R1 and R2 dsRNA (both at 100 ng/ $\mu$ l) in  
342 separate feeding trials to adult female *D. gallinae* mites resulted in a significant 1.9-fold  
343 reduction (for both R1 and R2 feeding trials) in expression of *Dg vATPase A* compared  
344 with control mites that fed on blood containing non-specific *lacZ* dsRNA [ $P < 0.05$ , one-  
345 way ANOVA with Dunnett's multiple comparison test] (Fig. 4a). Under similar feeding  
346 methodology, combining R1 and R2 *Dg vATPase A* (100 ng/ $\mu$ l dsRNA, consisting of

347 an equimolar mix of R1 and R2 dsRNA) dsRNAs resulted in a significant 2.6-fold  
348 reduction in expression of *Dg vATPase A* compared with control mites that fed from  
349 non-specific *lacZ* dsRNA [ $P < 0.05$ , Student's t-test] (Fig. 4b). During both feeding trials  
350 there was no gross observable phenotypic difference between mites fed with *Dg*  
351 *vATPase A* dsRNA and mites fed with control *lacZ* dsRNA.

352

### 353 **RNAi mediated gene silencing in *D. gallinae* is initiated quickly and is long** 354 **lasting**

355 Feeding combined R1 and R2 *Dg vATPase A* dsRNA to adult female *D. gallinae* mites  
356 resulted in rapid reduction of *Dg vATPase A* gene expression compared to control  
357 mites treated with the non-specific *lacZ* dsRNA. A significant reduction in *Dg vATPase*  
358 *A* expression was detectable by 24h post dsRNA delivery, and was maintained for at  
359 least 120h post dsRNA delivery (Fig. 5). At each time-point analysed, including 24h,  
360 48h, 72h and 120h expression of *Dg vATPase A* was significantly reduced by 2-fold,  
361 3.7-fold, 2.9-fold and 3.4-fold, respectively, relative to control (*lacZ*) fed mites [ $P < 0.05$ ,  
362 one-way ANOVA with Dunnett's multiple comparison test] (Fig. 5).

363

### 364 **Oral delivery of siRNAs does not down-regulate target gene expression**

365 Short dsRNAs were produced by either *in vitro* dicer treatment of synthesized long R1  
366 and R2 dsRNAs (Method-1) or commercial synthesis of two 27 bp dsRNA  
367 corresponding to regions of the *Dg vATPase A* gene (Method-2). The sequence of  
368 each synthesized siRNA is shown in Additional file 4: Fig S2. Feeding trials were used  
369 to deliver either diced-R1/R2 dsRNAs (Fig. 6a) or synthesized 27 bp dsRNAs (Fig.  
370 6b), along with the appropriate control dsRNA to adult female *D. gallinae* mites.  
371 Neither diced R1/R2 dsRNAs nor synthesized 27 bp dsRNAs resulted in down



372 regulation of the *Dg vATPase A* gene expression, and treated mites had comparable  
373 expression levels with control fed mites ( $P=0.1073$  for diced R1/R2 dsRNAs;  $P=0.6225$   
374 for synthesized 27 bp dsRNAs trial; Student's t-test).

375

## 376 **Discussion**

377 Here, we demonstrate the presence of genes encoding components of two of the main  
378 RNAi pathways in the genome of *D. gallinae*, namely the siRNA and miRNA pathways.  
379 Both exogenous and endogenous siRNA pathway components were identified in the  
380 *D. gallinae* genome but the major piRNA components, *Piwi*, *Aub* and *Ago3* genes,  
381 were lacking indicating either very dissimilar sequences of these genes or, more  
382 probable, the absence of this pathway in *D. gallinae*. We also demonstrate the utility  
383 of an *in vitro* feeding methodology (29) for the successful delivery of dsRNA to initiate  
384 prolonged, gene-specific RNAi in *D. gallinae* but show that orally-delivered short  
385 siRNA failed to initiate RNAi for the gene investigated herein.

386 In arthropods, three main RNAi mechanisms co-exist (small interfering RNAs  
387 (siRNA), microRNAs (miRNA), and Piwi-interacting RNAs (piRNA) (17) but in several  
388 species of the Acari investigated to date, the piRNA pathway has been notably absent.  
389 The piRNA pathway appears to be absent in: the sheep scab mite, *Psoroptes ovis*  
390 (19), the human itch mite, *Sarcoptes scabiei* (18) and the house dust  
391 mites, *Dermatophagoides farinae* (35), *Dermatophagoides pteronyssinus* (18) and  
392 *Euroglyphus maynei* (18). In *Drosophila*, where the piRNA biology is best  
393 characterised, the piRNA pathway silences transposons during germline  
394 development, thereby protecting the inherited genome from mutation (36). The  
395 apparent lack of the piRNA pathway in *D. gallinae* and other members of the Acari,  
396 reflects the dynamic nature of RNAi pathways in mites and may indicate species-



397 specific biology. The molecular mechanism/s which protect *D. gallinae* and other Acari  
398 lacking the piRNA pathway against the deleterious effects of transposon activity in the  
399 germline await investigation.

400 Our work presented here demonstrated that components of the siRNA pathway  
401 are present in the *D. gallinae* genome. One notable absence was the lack of a *D.*  
402 *gallinae* Ago2 orthologue, onto which the mature siRNA is loaded and is required for  
403 gene silencing (Fig 1). Although a definitive orthologue of Ago2 was not discovered in  
404 *D. gallinae*, the argonaute family was expanded with 25 family members, some of  
405 which were unique to *D. gallinae*, raising the possibility that, in *D. gallinae*, Ago2 is  
406 replaced by another yet uncharacterised argonaute. Our experimental work presented  
407 here confirms that although an Ago2 orthologue is missing in *D. gallinae*, the siRNA  
408 pathway is functional and can be exploited by feeding exogenous dsRNA, resulting in  
409 specific knockdown of the targeted *Dg vATPase A* gene. In our RNAi feeding  
410 experiments, *Dg vATPase A* was chosen as a target, as it has been previously  
411 targetted in *T. urticae*, where down-regulation resulted in a colour change phenotype  
412 in *vATPaseA* gene silenced *T. urticae* mites (22). Using a similar dsRNA feeding  
413 methodology, we achieved gene silencing of *Dg vATPase A*, but this was not  
414 associated with any notable phenotypic changes. In experiments investigating dsRNA  
415 length, we were able to achieve robust and reproducible *Dg vATPase A* knockdown  
416 using dsRNAs of 385bp and 495bp. However, when we targeted the same gene with  
417 short siRNAs, produced from either dicing the long dsRNAs or commercially  
418 synthesizing a short 27bp siRNA, the gene knockdown effect was lost. Recent RNAi  
419 experiments in *T. urticae* demonstrate there is a size threshold for effective gene  
420 silencing, where long dsRNAs resulted in robust gene silencing, while shorter dsRNAs  
421 (100 – 200 bp) were not effective (37). In *D. gallinae* the lower limit of dsRNA size for

422 efficient gene silencing is currently unknown and awaits further investigation. The lack  
423 of gene silencing by short siRNAs in *D. gallinae* may result from three possibilities: i)  
424 uptake of short dsRNA from food is limited and therefore does not induce RNAi  
425 pathway; ii) the abundance of siRNAs saturates the intracellular RNA uptake system  
426 system; or iii) short dsRNAs are transported but not recognized by cellular RNAi  
427 processing machinery.

428         Functional RNAi is an important tool in both model and non-model organisms  
429 to investigate genes of unknown function. For example, RNAi has been exploited in  
430 *Drosophila* to investigate gene function in cultured cells using high throughput  
431 screening methods (38). Functional RNAi in *D. gallinae*, using methodologies  
432 described here, is particularly timely for investigating genes of unknown function in *D.*  
433 *gallinae*. Recent completion of the draft *D. gallinae* genome sequence (959 Mbp  
434 assembly) identified 14,608 protein coding genes, of which 768 appear to be unique  
435 to *D. gallinae*, without similarity to proteins in the NCBI nr protein database (13).  
436 Therefore development of a robust and reproducible RNAi methodology, coupled with  
437 -omic technologies offers a powerful approach to begin investigating gene function  
438 and biology that is unique to *D. gallinae*. In addition, RNAi methodologies for *D.*  
439 *gallinae* are likely to be a useful tool in the development of novel control methods,  
440 including vaccine development, as it will support the research community with interests  
441 in *D. gallinae* control (39-41). RNAi mediated gene silencing in *D. gallinae*, coupled  
442 with either *in vitro* bioassays (29), or on-bird feeding assays (42) will allow rapid  
443 screening of potential *D. gallinae* vaccine candidates and druggable targets.  
444 Significantly, utilising RNAi to screen for vaccine candidates in *D. gallinae* will likely  
445 speed up the process of antigen discovery and in turn conform to 3R principles of  
446 using fewer animals for vaccine trials.

447

## 448 **Conclusions**

449 We found evidence for the presence of two RNAi pathways in *D. gallinae* and also  
450 successfully demonstrated that our functional gene knockdown protocol can be  
451 initiated by feeding gene-specific dsRNA in an improved *in vitro* feeding device. This  
452 opens the door for larger scale, genome-wide screening for novel *D. gallinae* control  
453 targets and also the opportunity to ascribe functions, using phenotypic assays, to the  
454 multiple genes of unknown function identified within the *D. gallinae* genome, for which  
455 no homologues exist in other species.

456

## 457 **Availability of data and material**

458 The *Dg vATPase A* nucleotide coding sequence is available in the NCBI database  
459 using the following accession number: MW032475.

460

## 461 **Acknowledgements**

462 The authors gratefully acknowledge funding for this project from the Scottish  
463 Government Rural Affairs, Food and the Environment (RAFE) Strategic Research  
464 Portfolio 2016-2021. DRGP is supported by a research fellowship provided by the  
465 Moredun Foundation. WC is supported by a studentship provided by the Univeristy of  
466 Aberdeen and the Moredun Foundation. We would like to thank the Bioservices Unit,  
467 Moredun Research Institute, for expert care of the animals.

468

## 469 **Authors' contributions**

470 AJN, DRGP, STGB, WC designed the study; DRGP, WC performed research; AJN,  
471 DRGP, STGB, WC drafted the paper. ASB, FN, JMS and KB edited the paper. FN and

472 KB trained DRGP and WC in use of *in vitro* feeding devices. All authors read and  
473 approved the final manuscript.

474

## 475 **References**

- 476 1. George DR, Finn RD, Graham KM, Mul MF, Maurer V, Moro CV, et al. Should  
477 the poultry red mite *Dermanyssus gallinae* be of wider concern for veterinary  
478 and medical science? *Parasit Vectors*. 2015;8:178.
- 479 2. Sparagano OA, George DR, Harrington DW, Giangaspero A. Significance and  
480 control of the poultry red mite, *Dermanyssus gallinae*. *Annu Rev Entomol*.  
481 2014;59:447-66.
- 482 3. Chauve C. The poultry red mite *Dermanyssus gallinae* (De Geer, 1778): current  
483 situation and future prospects for control. *Vet Parasitol*. 1998;79(3):239-45.
- 484 4. Sikes RK, Chamberlain RW. Laboratory observations on three species of bird  
485 mites. *J Parasitol*. 1954;40(6):691-7.
- 486 5. Kilpinen O, Roepstorff A, Permin A, Nørgaard-Nielsen G, Lawson LG,  
487 Simonsen HB. Influence of *Dermanyssus gallinae* and *Ascaridia galli* infections  
488 on behaviour and health of laying hens (*Gallus gallus domesticus*). *Br Poult Sci*.  
489 2005;46(1):26-34.
- 490 6. Sigognault Flochlay A, Thomas E, Sparagano O. Poultry red mite  
491 (*Dermanyssus gallinae*) infestation: a broad impact parasitological disease that  
492 still remains a significant challenge for the egg-laying industry in Europe.  
493 *Parasit Vectors*. 2017;10(1):357.
- 494 7. Valiente Moro C, De Luna CJ, Tod A, Guy JH, Sparagano OA, Zenner L. The  
495 poultry red mite (*Dermanyssus gallinae*): a potential vector of pathogenic  
496 agents. *Experimental & applied acarology*. 2009;48(1-2):93-104.

- 497 8. Lay DC, Jr., Fulton RM, Hester PY, Karcher DM, Kjaer JB, Mench JA, et al. Hen  
498 welfare in different housing systems. *Poult Sci.* 2011;90(1):278-94.
- 499 9. Mul M, Van Niekerk T, Chirico J, Maurer V, Kilpinen O, Sparagano O, et al.  
500 Control methods for *Dermanyssus gallinae* in systems for laying hens: results  
501 of an international seminar. *World's Poultry Science Journal.* 2009;65(4):589-  
502 600.
- 503 10. Zenner L, Bon G, Chauve C, Nemoz C, Lubac S. Monitoring of *Dermanyssus*  
504 *gallinae* in free-range poultry farms. *Experimental & applied acarology.*  
505 2009;48(1-2):157-66.
- 506 11. Brauneis MD, Zoller H, Williams H, Zschiesche E, Heckerroth AR. The acaricidal  
507 speed of kill of orally administered fluralaner against poultry red mites  
508 (*Dermanyssus gallinae*) on laying hens and its impact on mite reproduction.  
509 *Parasit Vectors.* 2017;10(1):594.
- 510 12. Abbas RZ, Colwell DD, Iqbal Z, Khan A. Acaricidal drug resistance in poultry  
511 red mite (*Dermanyssus gallinae*) and approaches to its management. *World's*  
512 *Poultry Science Journal.* 2014;70(1):113-24.
- 513 13. Burgess STG, Bartley K, Nunn F, Wright HW, Hughes M, Gemmell M, et al.  
514 Draft Genome Assembly of the Poultry Red Mite, *Dermanyssus gallinae*.  
515 *Microbiol Resour Announc.* 2018;7(18).
- 516 14. Schicht S, Qi W, Poveda L, Strube C. Whole transcriptome analysis of the  
517 poultry red mite *Dermanyssus gallinae* (De Geer, 1778). *Parasitology.*  
518 2014;141(3):336-46.
- 519 15. Fire A, Xu S, Montgomery MK, Kostas SA, Driver SE, Mello CC. Potent and  
520 specific genetic interference by double-stranded RNA in *Caenorhabditis*  
521 *elegans*. *Nature.* 1998;391(6669):806-11.

- 522 16. Joga MR, Zotti MJ, Smaghe G, Christiaens O. RNAi Efficiency, Systemic  
523 Properties, and Novel Delivery Methods for Pest Insect Control: What We Know  
524 So Far. *Front Physiol.* 2016;7:553.
- 525 17. Zhu KY, Palli SR. Mechanisms, applications, and challenges of insect RNA  
526 interference. *Annu Rev Entomol.* 2020;65:293-311.
- 527 18. Nganso BT, Sela N, Soroker V. A genome-wide screening for RNAi pathway  
528 proteins in Acari, 28 August 2020, PREPRINT (Version 2). available at  
529 Research Square [[+https://doi.org/10.21203/rs.3.rs-38229/v2](https://doi.org/10.21203/rs.3.rs-38229/v2)]. 2020.
- 530 19. Marr EJ, Wright HW, Sargison ND, Nisbet AJ, Burgess STG. Gene silencing by  
531 RNA interference in the ectoparasitic mite, *Psoroptes ovis*. *Veterinary research.*  
532 2018;49(1):112.
- 533 20. Campbell EM, Budge GE, Bowman AS. Gene-knockdown in the honey bee  
534 mite *Varroa destructor* by a non-invasive approach: studies on a glutathione S-  
535 transferase. *Parasit Vectors.* 2010;3:73.
- 536 21. Kamau LM, Wright HW, Nisbet AJ, Bowman AS. Development of an RNA-  
537 interference procedure for gene knockdown in the poultry red mite,  
538 *Dermanysus gallinae*: Studies on histamine releasing factor and Cathepsin-D.  
539 *African Journal of Biotechnology.* 2013;12(12):1350-6.
- 540 22. Suzuki T, Nunes MA, España MU, Namin HH, Jin P, Bensoussan N, et al. RNAi-  
541 based reverse genetics in the chelicerate model *Tetranychus urticae*: A  
542 comparative analysis of five methods for gene silencing. *PLoS One.*  
543 2017;12(7):e0180654.
- 544 23. Thurmond J, Goodman JL, Strelets VB, Attrill H, Gramates LS, Marygold SJ, et  
545 al. FlyBase 2.0: the next generation. *Nucleic Acids Res.* 2019;47(D1):D759-  
546 d65.

- 547 24. El-Gebali S, Mistry J, Bateman A, Eddy SR, Luciani A, Potter SC, et al. The  
548 Pfam protein families database in 2019. *Nucleic Acids Res.* 2019;47(D1):D427-  
549 d32.
- 550 25. Edgar RC. MUSCLE: a multiple sequence alignment method with reduced time  
551 and space complexity. *BMC Bioinformatics.* 2004;5:113.
- 552 26. Capella-Gutiérrez S, Silla-Martínez JM, Gabaldón T. trimAl: a tool for  
553 automated alignment trimming in large-scale phylogenetic analyses.  
554 *Bioinformatics.* 2009;25(15):1972-3.
- 555 27. Stecher G, Tamura K, Kumar S. Molecular Evolutionary Genetics Analysis  
556 (MEGA) for macOS. *Mol Biol Evol.* 2020;37(4):1237-9.
- 557 28. Sterck L, Billiau K, Abeel T, Rouzé P, Van de Peer Y. ORCAE: online resource  
558 for community annotation of eukaryotes. *Nat Methods.* 2012;9(11):1041.
- 559 29. Wright HW, Bartley K, Nisbet AJ, McDevitt RM, Sparks NH, Brocklehurst S, et  
560 al. The testing of antibodies raised against poultry red mite antigens in an  
561 vitro feeding assay; preliminary screen for vaccine candidates. *Experimental &*  
562 *applied acarology.* 2009;48(1-2):81-91.
- 563 30. Untergasser A, Nijveen H, Rao X, Bisseling T, Geurts R, Leunissen JA.  
564 Primer3Plus, an enhanced web interface to Primer3. *Nucleic Acids Res.*  
565 2007;35(Web Server issue):W71-4.
- 566 31. Grbić M, Van Leeuwen T, Clark RM, Rombauts S, Rouzé P, Grbić V, et al. The  
567 genome of *Tetranychus urticae* reveals herbivorous pest adaptations. *Nature.*  
568 2011;479(7374):487-92.
- 569 32. Höck J, Meister G. The Argonaute protein family. *Genome Biol.* 2008;9(2):210.

- 570 33. Matsumoto N, Nishimasu H, Sakakibara K, Nishida KM, Hirano T, Ishitani R, et  
571 al. Crystal Structure of Silkworm PIWI-Clade Argonaute Siwi Bound to piRNA.  
572 Cell. 2016;167(2):484-97.e9.
- 573 34. Pinzón N, Bertrand S, Subirana L, Busseau I, Escrivá H, Seitz H. Functional  
574 lability of RNA-dependent RNA polymerases in animals. PLoS Genet.  
575 2019;15(2):e1007915.
- 576 35. Mondal M, Klimov P, Flynt AS. Rewired RNAi-mediated genome surveillance  
577 in house dust mites. PLoS Genet. 2018;14(1):e1007183.
- 578 36. Parhad SS, Theurkauf WE. Rapid evolution and conserved function of the  
579 piRNA pathway. Open Biol. 2019;9(1):180181.
- 580 37. Bensoussan N, Dixit S, Tabara M, Letwin D, Milojevic M, Antonacci M, et al.  
581 Environmental RNA interference in two-spotted spider mite, *Tetranychus*  
582 *urticae*, reveals dsRNA processing requirements for efficient RNAi response.  
583 bioRxiv. 2020:2020.05.10.087429.
- 584 38. Heigwer F, Port F, Boutros M. RNA Interference (RNAi) Screening in  
585 *Drosophila*. Genetics. 2018;208(3):853-74.
- 586 39. Price DRG, Küster T, Øines Ø, Oliver EM, Bartley K, Nunn F, et al. Evaluation  
587 of vaccine delivery systems for inducing long-lived antibody responses to  
588 *Dermanyssus gallinae* antigen in laying hens. Avian Pathol.  
589 2019;48(sup1):S60-s74.
- 590 40. Bartley K, Turnbull F, Wright HW, Huntley JF, Palarea-Albaladejo J, Nath M, et  
591 al. Field evaluation of poultry red mite (*Dermanyssus gallinae*) native and  
592 recombinant prototype vaccines. Vet Parasitol. 2017;244:25-34.
- 593 41. Bartley K, Wright HW, Huntley JF, Manson ED, Inglis NF, McLean K, et al.  
594 Identification and evaluation of vaccine candidate antigens from the poultry red



595 mite (*Dermanyssus gallinae*). International journal for parasitology.  
596 2015;45(13):819-30.

597 42. Nunn F, Bartley K, Palarea-Albaladejo J, Innocent GT, Turnbull F, Wright HW,  
598 et al. A novel, high-welfare methodology for evaluating poultry red mite  
599 interventions in vivo. Vet Parasitol. 2019;267:42-6.

600

601

602

603

604

605

606

607

608

609

610

611

612

613

614

615

616

617

618

619

620 **Figures**

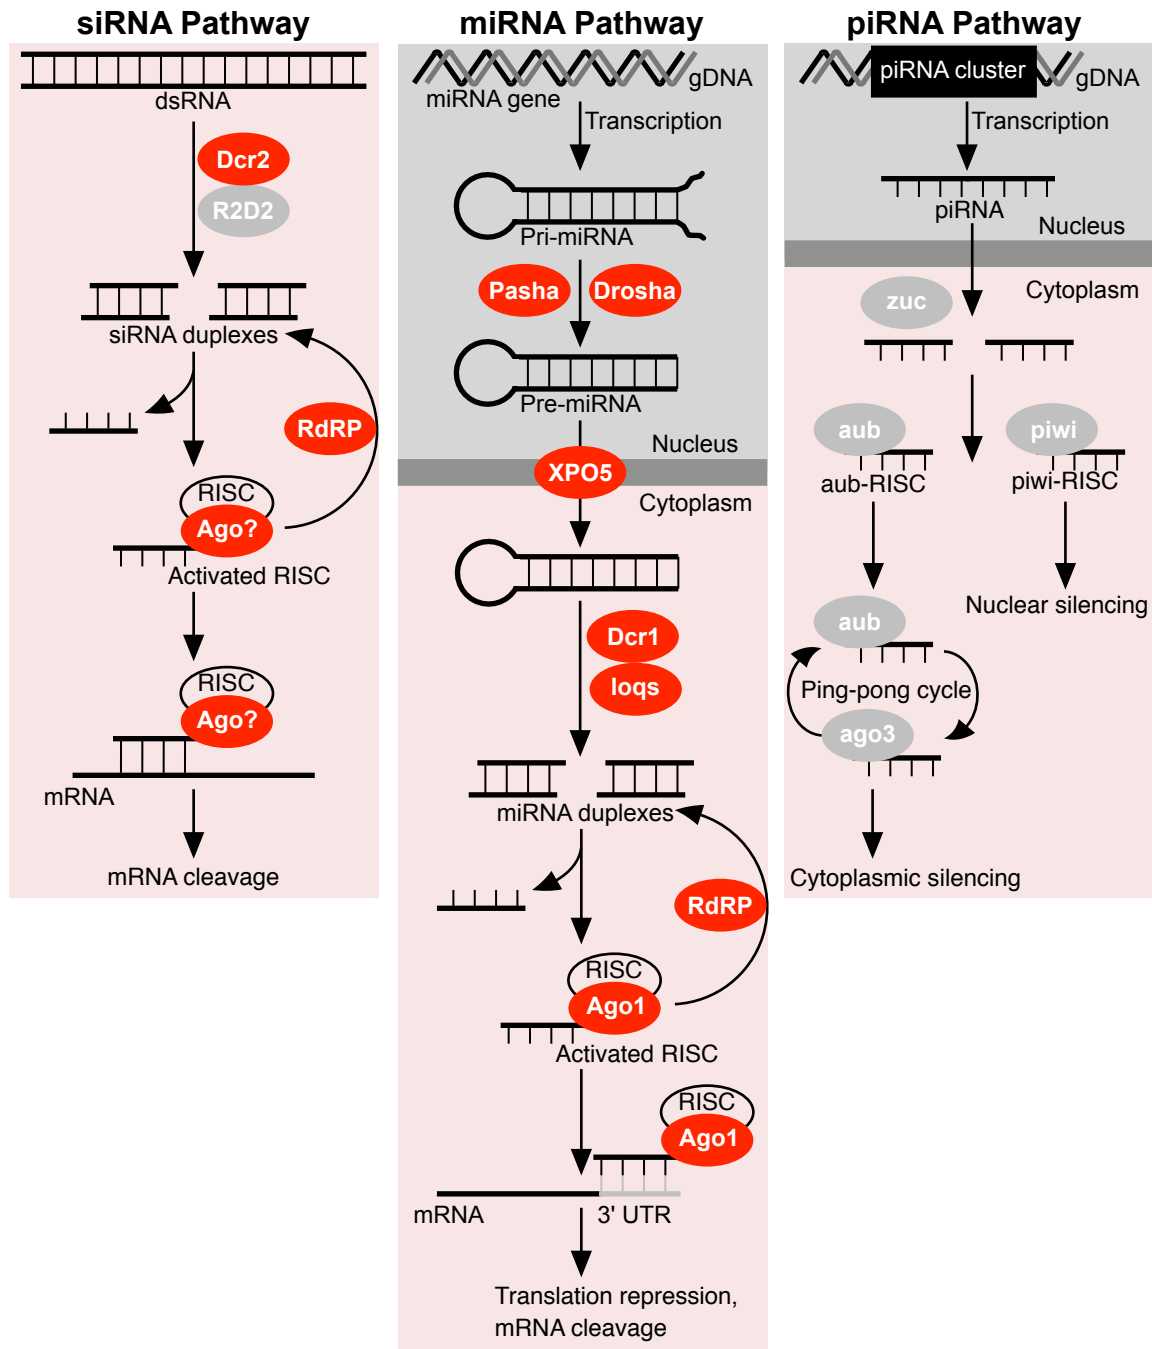

621

622 **Fig. 1 RNA interference (RNAi) pathways in *D. gallinae*.** Core RNAi pathway

623 enzymes are shown in either red (present in *D.gallinae*) or grey (absent in *D. gallinae*).

624 **siRNA pathway:** dsRNA (either viral or experimentally introduced) is processed by

625 Dicer-2 (Dcr-2) into 21-23 nt siRNAs and loaded into the RISC complex. Argonaute

626 (Ago) cleaves the passenger strand of the siRNA and retains the guide strand which

627 guides the active siRISC complex to the target mRNA. Full complementarity between  
628 the guide siRNA strand and target mRNA leads to cleavage of the mRNA. **miRNA**  
629 **pathway:** The miRNA gene is transcribed in the nucleus to generate pri-miRNA which  
630 is then cleaved by Drosha and Pasha to form a pre-miRNA. The pre-miRNA is  
631 transported to the cytoplasm through Exportin-5 (XPO5) and cleaved by Dicer-1 (Dcr-  
632 1) to yield miRNA. The miRNA is loaded into the RISC complex and argonaute (Ago)  
633 cleaves the passenger strand of the miRNA and retains the guide strand which guides  
634 the active miRISC complex to the target mRNA. Partial complementarity between the  
635 guide strand and target mRNA leads to either translation repression or cleavage of the  
636 mRNA. miRNAs usually target several genes, with shared sequences in the 3'  
637 untranslated region (UTR). In both pathways siRNAs and miRNAs are amplified by  
638 RNA-dependent RNA polymerase (RdRP). **piRNA pathway:** The piwi-interacting  
639 RNA (piRNA) pathway functions in germline cells to protect against transposable  
640 elements. Antisense piRNAs are transcribed from repetitive elements in gDNA and  
641 processed by zucchini (zuc) into 26 – 32 nt primary piRNAs. Primary piRNAs associate  
642 with either piwi or abuergine (Aub). Piwi associated piRNAs are translocated to the  
643 nucleus, while Aub associated piRNAs cleave cytoplasmic transposon transcripts and  
644 trigger a 'ping-pong' piRNA amplification. Following transposon transcript cleavage  
645 argonaute 3 (AGO3) is loaded with secondary piRNAs which in turn produce piRNAs  
646 that associate with Aub, resulting in silencing of cytoplasmic transposon transcripts.

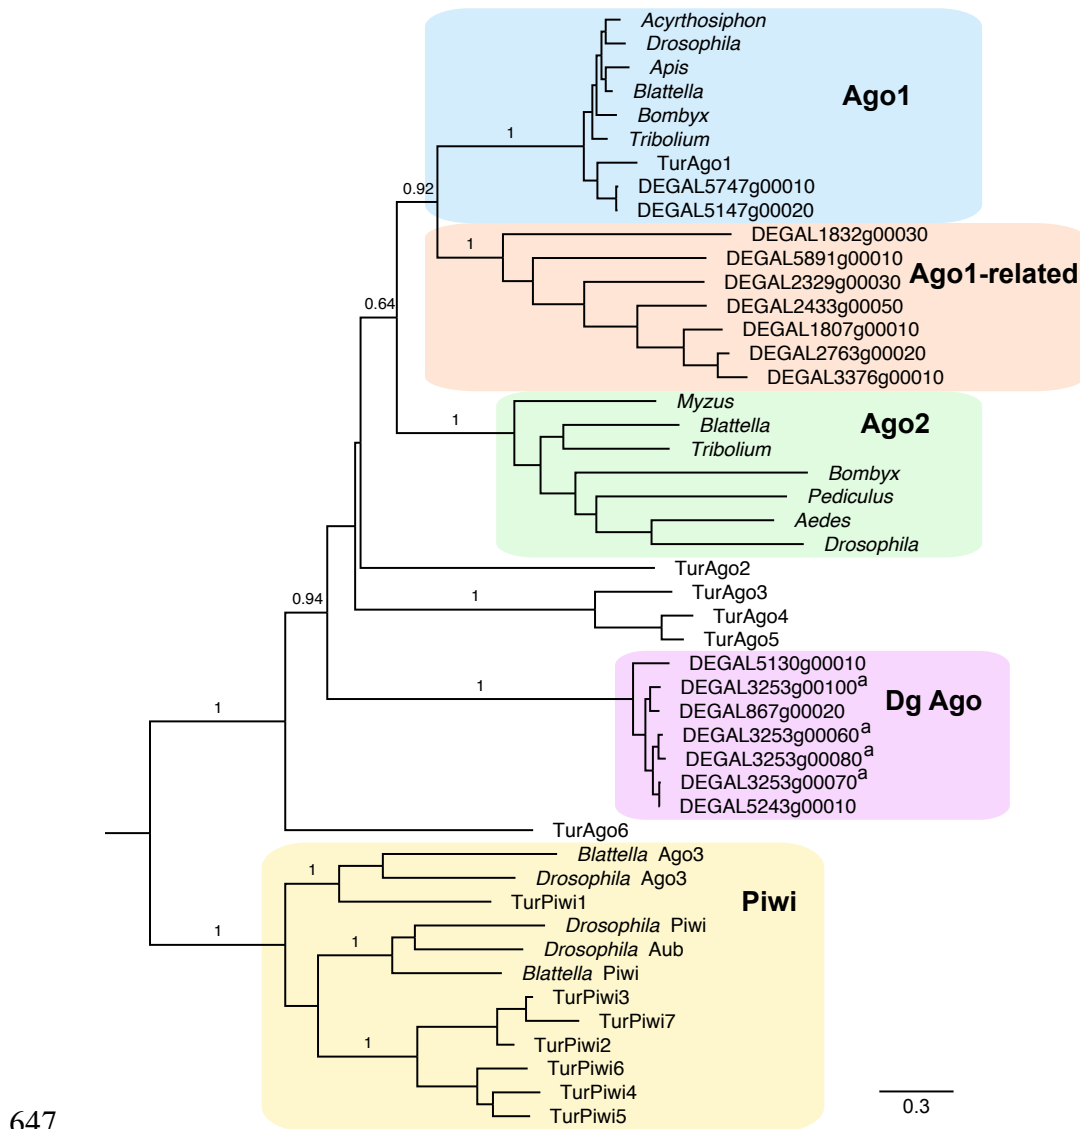

647

648 **Fig. 2 Phylogenetic analysis of Argonaute-like proteins from *D. gallinae* and**  
 649 **other arthropods.** All *D. gallinae* sequences are available at OrcAE using DEGAL  
 650 accession numbers shown in the alignment. The species and accession number of all  
 651 other sequences are shown in Additional file 1: Table S1. All protein sequences were  
 652 aligned using MUSCLE and phylogenies reconstructed using maximum-likelihood  
 653 (ML) methods with a LG+G substitution model. Bootstrap support values >0.6 from  
 654 1000 replicates are shown at each major node. Scale bar represents 0.3 substitutions  
 655 per amino acid site. *D. gallinae* Argonaute genes that are located on the same genomic  
 656 scaffold are indicated by a superscript letter.

657

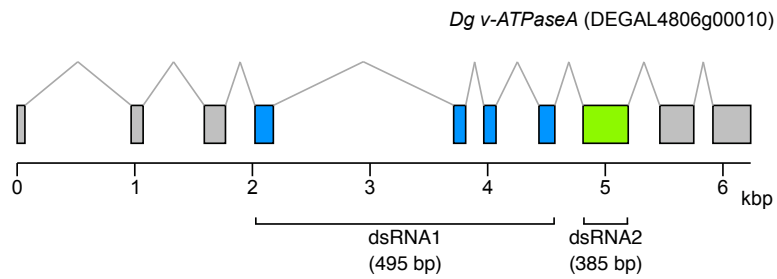

658

659

660 **Fig. 3 Regions of *Dg vATPase A* gene used for dsRNA synthesis.** Schematic

661 representation of the *Dg vATPase A* gDNA locus in *D. gallinae* gDNA scaffold

662 DEGAL4806g00010 (34.1 kbp) location of Region 1 (R1) [exons 4, 5, 6 and 7] and

663 Region 2 (R2) [exon 8] used for dsRNA synthesis.

664

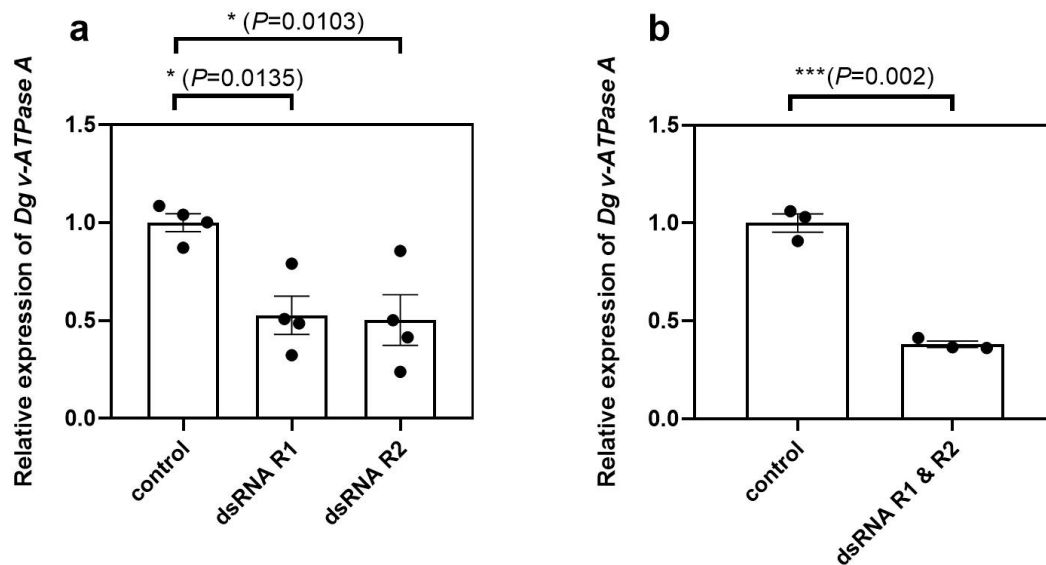

665

666 **Fig. 4 RNAi gene knockdown of *Dg vATPase A* in *D. gallinae*.** qPCR gene

667 expression analysis of *Dg vATPase A* expression in adult female *D. gallinae* mites fed

668 on *lacZ* dsRNA (control) or *Dg vATPase A* dsRNA from Region 1 (R1) or Region 2

669 (R2). R1 and R2 *Dg vATPase A* dsRNAs were either fed separately **a** or combined **b**

670 with a total dsRNA at 100 ng/μl (final concentration, with experiment **b** containing

671 equimolar amounts of R1 and R2 dsRNA) in each experiment. *Dg vATPase A*

672 expression shown at 96h post-feed and is normalised to *GAPDH* expression.

673 Individual data points for biological replicates are shown with mean ± SEM indicated

674 (n=3-4). Asterisks represent significant difference ( $P<0.05$ ) between treatments

675 determined by **a** one-way ANOVA with Dunnett's multiple comparison test or **b**

676 Student's t-test.

677

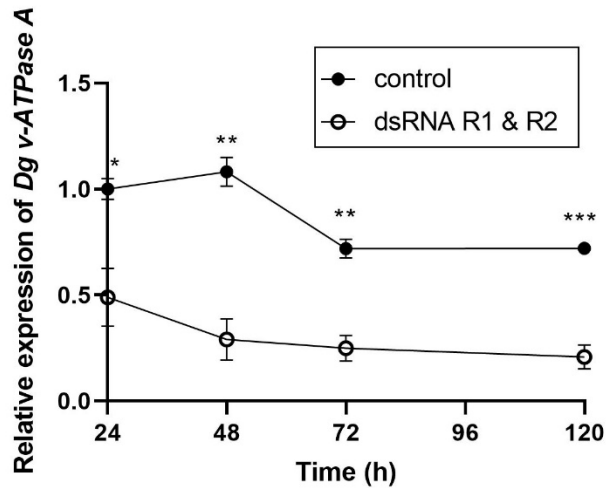

678

679 **Fig. 5 Persistence of RNAi gene knockdown of *Dg vATPase A* in *D. gallinae*.**

680 qPCR gene expression analysis of *Dg vATPase A* expression in adult female *D.*

681 *gallinae* mites fed on *lacZ* dsRNA (control) or combined *Dg vATPase A* dsRNA from

682 Regions 1 and 2 (R1 and R2). In control and *Dg vATPase A* dsRNA feeding

683 experiments total dsRNA was delivered at 100 ng/ $\mu$ l (final concentration, containing

684 equimolar amounts of R1 and R2 dsRNA) and *Dg vATPase A* expression levels

685 monitored over a 120h post-feed time course. Individual data points for biological

686 replicates are shown with mean  $\pm$  SEM indicated (n=3-4). Asterisks represent

687 significant difference ( $P < 0.05$ ) between treatments determined by one-way ANOVA

688 with Dunnett's multiple comparison test

689

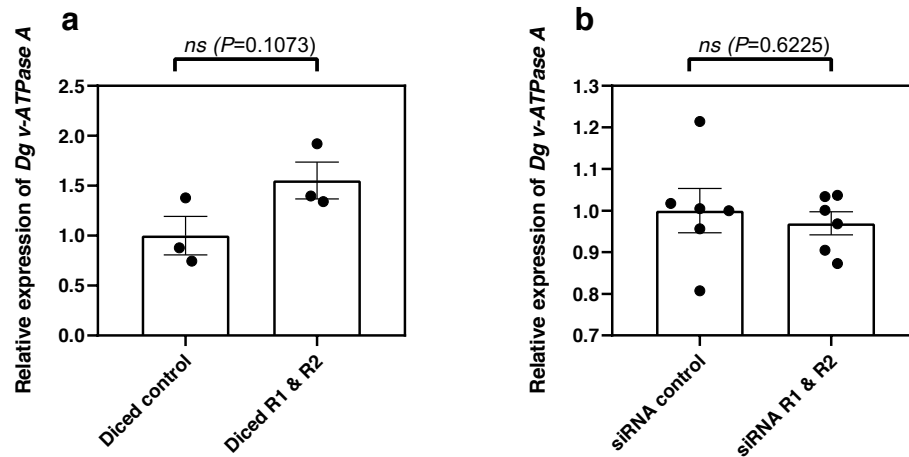

690

691 **Fig. 6 siRNAi gene knockdown of *Dg vATPase A* in *D. gallinae*.** qPCR gene

692 expression analysis of *Dg vATPase A* expression in adult female *D. gallinae* mites fed

693 on *Dg vATPase A* siRNAs or *lacZ* siRNA (control. **a** Long R1 and R2 *Dg vATPase A*

694 dsRNAs and long *lacZ* dsRNA were for diced to produce short siRNAs and fed at 100

695 ng/μl. **b** siRNAs (27-mer) for *Dg vATPaseA* and *LacZ* (control) were commercially

696 synthesized and fed at 100 ng/μl. For both **a** and **b** *Dg vATPase A* expression shown

697 at 96h post-feed and is normalised to *GAPDH* expression. Individual data points for

698 biological replicates are shown with mean ± SEM indicated (n=3-6). No significant

699 differences (ns) were detected between treatment groups using Student's t-test.

700



701 **Tables.**

702 **Table 1. Identification of *D. gallinae* core RNAi pathway genes**

| <b>Gene name [Gene symbol] (species)</b>             | <b><i>D. gallinae</i> gene ID</b> | <b>Blast E-value</b> |
|------------------------------------------------------|-----------------------------------|----------------------|
| <i>Dicer-1</i> [ <i>Dcr-1</i> ] (D)                  | DEGAL4207g00210                   | 1.00E-141            |
| <i>Dicer-2</i> [ <i>Dcr-2</i> ] (D)                  | DEGAL2576g00010                   | 2.00E-57             |
| <i>Partner of Drosha</i> [ <i>pasha</i> ] (D)        | DEGAL6243g00040                   | 1.00E-97             |
| <i>Drosha</i> [ <i>Drosha</i> ] (D)                  | DEGAL3563g00160                   | 0                    |
| <i>Loquacious</i> [ <i>loqs</i> ] (D)                | DEGAL6165g00020 <sup>f</sup>      | 2.00E-32             |
|                                                      | DEGAL6165g00030 <sup>f</sup>      | 4.00E-14             |
| <i>Argonaute-1, -2, -3</i> [ <i>AGO1, 2, 3</i> ] (D) | DEGAL5747g00010                   | 0                    |
|                                                      | DEGAL5147g00020 <sup>a</sup>      | 0                    |
|                                                      | DEGAL2433g00050                   | 3E-167               |
|                                                      | DEGAL1807g00010                   | 2E-146               |
|                                                      | DEGAL5891g00010                   | 1E-141               |
|                                                      | DEGAL2763g00020                   | 2E-141               |
|                                                      | DEGAL2329g00030                   | 3E-138               |
|                                                      | DEGAL3376g00010                   | 3E-118               |
|                                                      | DEGAL1832g00030                   | 5E-106               |
|                                                      | DEGAL3253g00060 <sup>b</sup>      | 2E-101               |
|                                                      | DEGAL3253g00070 <sup>b</sup>      | 1E-100               |
|                                                      | DEGAL5243g00010                   | 6E-99                |
|                                                      | DEGAL3253g00080 <sup>b</sup>      | 9E-99                |
|                                                      | DEGAL3253g00100 <sup>b</sup>      | 1E-98                |
|                                                      | DEGAL867g00020 <sup>c</sup>       | 4E-98                |
| DEGAL5130g00010                                      | 3E-91                             |                      |

|                                                   |                              |           |
|---------------------------------------------------|------------------------------|-----------|
|                                                   | DEGAL4347g00070              | 1E-76     |
|                                                   | DEGAL1695g00010 <sup>d</sup> | 5E-62     |
|                                                   | DEGAL1695g00020 <sup>d</sup> | 3E-56     |
|                                                   | DEGAL4104g00020              | 3E-38     |
|                                                   | DEGAL867g00010 <sup>c</sup>  | 3E-37     |
|                                                   | DEGAL6462g00020 <sup>e</sup> | 8E-31     |
|                                                   | DEGAL6462g00010 <sup>e</sup> | 1E-21     |
|                                                   | DEGAL2892g00010              | 2E-20     |
|                                                   | DEGAL5147g00040 <sup>a</sup> | 9E-16     |
| <i>Exportin-5</i> [XPO5] (D)                      | DEGAL4407g00370              | 2.00E-25  |
| <i>RNA-dependent RNA polymerase</i><br>[RdRP] (C) | DEGAL1833g00010              | 1.00E-100 |
|                                                   | DEGAL2592g00050              | 1.00E-100 |
|                                                   | DEGAL4182g00030              | 5.00E-100 |
|                                                   | DEGAL2262g00020              | 2.00E-98  |
|                                                   | DEGAL6675g00010              | 1.00E-94  |
|                                                   | DEGAL6621g00090              | 5.00E-92  |
|                                                   | DEGAL6161g00150 <sup>g</sup> | 2.00E-52  |
|                                                   | DEGAL3284g00080              | 6.00E-25  |
|                                                   | DEGAL6161g00170 <sup>g</sup> | 4.00E-22  |

---

703

704 Each identified *D. gallinae* gene is an orthologue of *D. melanogaster* (D) or *C. elegans*

705 (C) RNAi pathway genes based on best reciprocal BLAST hit. Genes located on the

706 same *D. gallinae* scaffold are highlighted using the superscript letters a-g.

707

708 **Supplementary Figures and Tables**

709

710 **Additional file 1: Table S1.**

711 **Ago sequence accession numbers used for phylogenetic reconstruction.**

712

713

714

715

716

717

718

719

720

721

722

723

724

725

726

727

728

729

730

731

|                 |                                                                       |     |
|-----------------|-----------------------------------------------------------------------|-----|
| DEGAL4806g00010 | <b>MSL</b> PKISDAKESYGYVHAVSGPVVTARDMEGAAMYELVVRVGHEELVGEI IKLEGGMATI | 60  |
| XP_022670784    | MSLPKILDAKESYGYVHAVSGPVI TARDMEGAAMYELVVRVGHDELVGEI IKLEGGMATI        | 60  |
| OQR76956        | MSLPKISDAKESYGYVHAVSGPVVTARDMEGAAMYELVVRVGHEELVGEI IKLEGGMATI         | 60  |
| XP_003741079    | MSLPKVADAKESDYGYVHAVSGPVVTARDMGAAMYELVVRVGHDELVGEI IKLEGGMATI         | 60  |
|                 | *****: *****:*****:*****:*****:*****:*****:*****                      |     |
| DEGAL4806g00010 | QVYEETSGVTVGDPVLRTRKPLSVELGPGIMNSIFDGIQRPLRDINALTQSIYIPK----          | 116 |
| XP_022670784    | QVYEETSGVTVGDPVLRTRKPLSVELGPGIMNSIFDGIQRPLREINSKTQSIYIPK----          | 116 |
| OQR76956        | QVYEETSGVTVGDPVLRTRKPLSVELGPGIMNSIFDGIQRPLREINATTESIYIPKVSVI          | 120 |
| XP_003741079    | QVYEETSGVTVGDPVLRTRKPLSVELGPGIMNSIFDGIQRPLRDIGVLTDSIYIPK----          | 116 |
|                 | *****:*****:*****:*****:*****:*****:*****:*****:*****                 |     |
| DEGAL4806g00010 | -----GVNVPALSRSTQWEFTPTNIKIGSHVTGGDIYGTG-----                         | 151 |
| XP_022670784    | -----GINVPALSRNTLWEFTPANVKIGSHMTGGDIFGFVNENSLNHKIMLDPKAR              | 168 |
| OQR76956        | VTYKRPMVGNVPALSRHSQWEFTPANIKIGSHMTGGDIFGLVHNSMINHKIMLDPKAR            | 180 |
| XP_003741079    | -----GVNVPALPRDTQWEFPANIKIGSHMTGGDVFGTVVENSIMNHKIMLEPKAR              | 168 |
|                 | *:***** *: *:*:*:*:*:*:*:*:*:*:*:*:*:*:*:*:*:*:*:*:*:*:*:*            |     |
| DEGAL4806g00010 | --NAYIAAPGNVTVDDVLETFDGEKKKYTMMQIWPVRQPRPTAEKLAANFPLLTGQRV            | 209 |
| XP_022670784    | GTVTFVAAPGNVTVDEVDVLETFDGEKKKYTMMQVWPVRQPRPTAEKLAANHPLLTGQRV          | 228 |
| OQR76956        | GTVTYIAAPGNVTVNDVLETFDGEKKKYTMMQVWPVRQPRPTAEKLAANHPLLTGQRV            | 240 |
| XP_003741079    | GTVTYIAAPGNVTVEDVLETFDGEKKKYTMLQVWPVRQPRPTAEKLAANYPLLTGQRV            | 228 |
|                 | :*:*****:*****:*****:*****:*****:*****:*****:*****                    |     |
| DEGAL4806g00010 | LDTLPCVQGGTTAIPGAFGCGKTVISQSLSKFSNSDAI IYVCGGERGNEMSEVLRDFPE          | 269 |
| XP_022670784    | LDALPCVQGGTTAIPGAFGCGKTVISQSLSKYSNSDAI IYVCGGERGNEMSEVLRDFPE          | 288 |
| OQR76956        | LDSLPCVQGGTTAIPGAFGCGKTVISQSLSKFSNSDAI IYVCGGERGNEMSEVLRDFPE          | 300 |
| XP_003741079    | LDSLPCVQGGTTAIPGAFGCGKTVISQSLSKYSNSDAI IYVCGGERGNEMAEVLRDFPE          | 288 |
|                 | **:*:*:*:*:*:*:*:*:*:*:*:*:*:*:*:*:*:*:*:*:*:*:*:*:*:*:*:*:*          |     |
| DEGAL4806g00010 | LTTEVNGQVSI MQRTALVANTS NMPVAAREAS IYTGITLSEYFRDMGYNVAMMADSTSR        | 329 |
| XP_022670784    | LTTEVNGQQVSI MQRTALVANTS NMPVAAREAS IYTGITLSEYFRDMGFNVAMMADSTSR       | 348 |
| OQR76956        | LTTEVNGRQVSI MQRTALVANTS NMPVAAREAS IYTGITLSEYFRDMGYNVAMMADSTSR       | 360 |
| XP_003741079    | LTTEVDGQQVSI MQRTALVANTS NMPVAAREAS IYTGITLSEYFRDMGYNVAMMADSTSR       | 348 |
|                 | *****:*:*****:*****:*****:*****:*****:*****:*****:*****               |     |
| DEGAL4806g00010 | WAEALREISGRLAEMPADSGYPAYLAARLASFYERAGRVKCLGNPEREGSVTIVGAVSPP          | 389 |
| XP_022670784    | WAEALREISGRLAEMPADSGYPAYLAARLASFYERAGRVKCLGNPEREGSVTIVGAVSPP          | 408 |
| OQR76956        | WAEALREISGRLAEMPADSGYPAYLAARLASFYERAGRVKCLGNPEREGSVTIVGAVSPP          | 420 |
| XP_003741079    | WAEALREISGRLAEMPADSGYPAYLSARLASFYERSGRVKCLGNPEREGSVTIVGAVSPP          | 408 |
|                 | *****:*****:*****:*****:*****:*****:*****:*****:*****                 |     |
| DEGAL4806g00010 | GGDFSDPVTSATLSIVQVFWGLDKKLAQRKHFPSINWLISYSKYTNALDEYYDKNFSDF           | 449 |
| XP_022670784    | GGDFSDPVTSATLSIVQVFWGLDKKLAQRKHFPSVNWLSYSKYTNALDEFYDKNFPFT            | 468 |
| OQR76956        | GGDFSDPVTSATLSIVQVFWGLDKKLAQRKHFPSINCHISYSKYTGALDDYYDKNFPFT           | 480 |
| XP_003741079    | GGDFSDPVTSATLSIVQVFWGLDKKLAQRKHFPSVNWLSYSKYTNALDEYYDKHYDPFT           | 468 |
|                 | *****:*****:*****:*****:*****:*****:*****:*****:*****                 |     |
| DEGAL4806g00010 | QLRNKCSRILQEEEEELSEIVQLVGKASLGEREKITILEVAKLLKDDFLQNGYTPYDRYCP         | 509 |
| XP_022670784    | ALRNKCSRILQEEEEELSEIVQLVGKASLGEREKITILEVAKLIKDDFLQNGYTPYDRYCP         | 528 |
| OQR76956        | SLRNKCSRILQEEEEELSEIVQLVGKASLGEREKITILEVAKLIKDDYLVQNGYTPYDRYCP        | 540 |
| XP_003741079    | ALRNKCSRILQEEEEELSEIVQLVGKASLGEREKITILEVAKLIKDDFLQNGYTPYDRYCP         | 528 |
|                 | *****.*****:*****:*****:*****:*****:*****:*****:*****                 |     |
| DEGAL4806g00010 | FYKSVAMLRNMLGFYDMACHAVESTQQSENRI TWNVIREATGDILYQLSSMKFKPKDEG          | 569 |
| XP_022670784    | FYKSVAMLRNMLGFYDMACHAVDATQQSENRI TWNVIREAMGDILYQLSSMKFKNPTEES         | 588 |
| OQR76956        | FYKSVMLRNMLGFYDMACHSVEATQQSENRI TWNVIREAMGDILYQLSSMKFKPKDES           | 600 |
| XP_003741079    | FYKSVGLRNMLGFYDMACHAVDSTQQSENKITWNVIREAMGETLYQLTSMKFKDPKAET           | 588 |
|                 | *****.*****:*****:*****:*****:*****:*****:*****:*****                 |     |
| DEGAL4806g00010 | KEKILKDFDEL <b>FENMQQ</b> DKLSGGRVMISAFSVRRPTDPPLWDHRSY               | 615 |
| XP_022670784    | KEKILKDFDELHENMQQAFRNLED-----                                         | 612 |
| OQR76956        | KEKILKDFDDL YENMQQAFRNLED-----                                        | 624 |
| XP_003741079    | QEKILKDYEEL YDNMQQAFRNLED-----                                        | 612 |
|                 | :*****:*****:*****:*****:*****:*****:*****:*****:*****                |     |

732

733 **Additional file 2: Fig S1. Alignment of mite vATPase A proteins. Dg vATPase A**

734 and closely related vATPase A from mites were aligned using MUSCLE. Conserved

735 regions in all sequences are highlighted (\*). Sequences included in the alignment are:

736 Dg vATPase A (DEGAL4806g00010); and vATPase A from the following mites: *Varroa*  
737  *destructor*  (XP\_022670784); *Tropilaelaps mercedesae* (OQR76956) and  
738 *Galendromus occidentalis* (XP\_003741079). Conserved regions, against which  
739 coding sequence amplification primers were designed are highlighted in red.

740

741

742

743

744

745

746

747

748

749

750

751

752

753

754

755

756

757

758

759

760

761 **Additional file 3: Table S2. qPCR and RNAi construct primer sequences**

762

763

764

765

766

767

768

769

770

771

772

773

774

775

776

777

778

779

780

781

782

783

784

siRNA Region 1

5'- GUC UGA GGU ACU GCG UGA UUU CCC GGA -3'

||| ||| ||| ||| ||| ||| ||| ||| |||

3'- CAG ACU CCA UGA CGC ACU AAA GGG CCU -5'

siRNA Region R2

5'- GAA GAA AUA CAC GAU GAU GCA GAU AUG -3'

||| ||| ||| ||| ||| ||| ||| ||| |||

3'- CUU CUU UAU GUG CUA CUA CGU CUA UAC -5'

siRNA lacZ control

5'- GGA UUG ACC GUA AUG GGA UAG GUC ACG -3'

||| ||| ||| ||| ||| ||| ||| ||| |||

3'- CCU AAC UGG CAU UAC CCU AUC CAG UGC -5'

785

786

787 **Additional file 4: Fig S2. Regions used for synthetic siRNA synthesis.**

788

789

790

791

792

793

794

795

### Dicer-1 (Dcr-1)

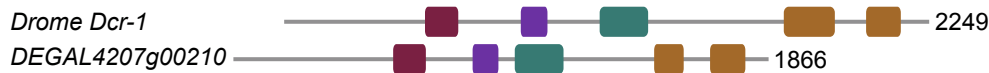

### Dicer-2 (Dcr-2)

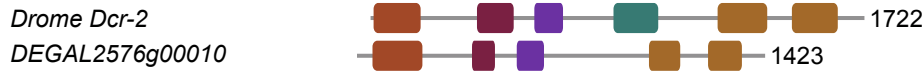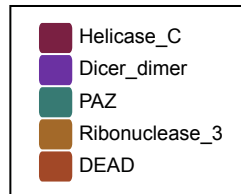

796

797 **Additional file 5: Fig S3. Domain architecture of *D. gallinae* Dicer proteins.** For

798 comparison the domain architecture of *D. melanogaster* dicer-1 (Dcr-1) and dicer-2

799 (Dcr-2) shown. *D. gallinae* Dcr-1 and Dcr-2 were identified as orthologues of Drome

800 Dcr-1 and Dcr-2, respectively. Pfam (<https://pfam.xfam.org>) functional domains

801 include: Helicase\_C (Helicase conserved C-terminal domain, PF00271); Dicer\_dimer

802 (Dicer dimerisation domain, PF03368); PAZ (PAZ domain, PF02170); Ribonuclease\_3

803 (Ribonuclease III domain, PF00636); DEAD (DEAD/DEAH box helicase, PF00270).

804 The length of each protein is shown as number of amino acids.

805

806

807



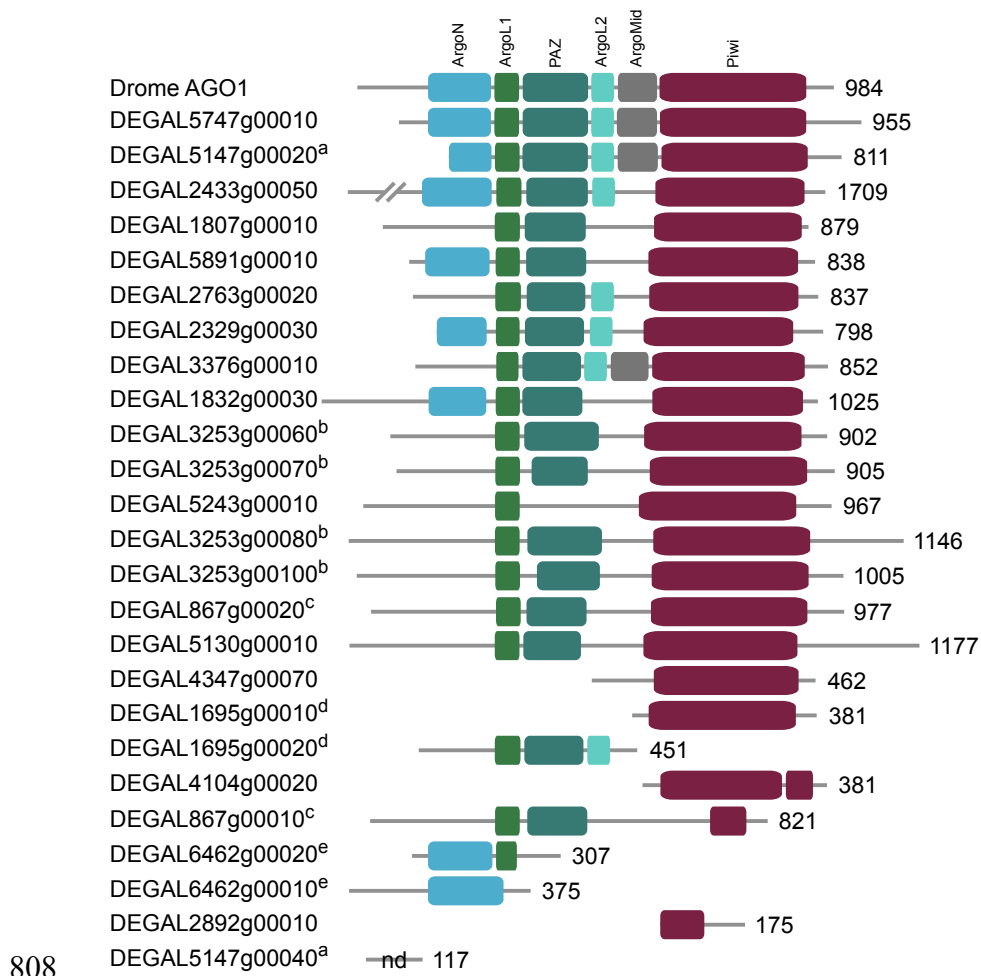

808

809 **Additional file 6: Fig S4. Domain architecture of *D. gallinae* argonaute proteins.**

810 For comparison the domain architecture of *D. melanogaster* argonaute-1 (Drome  
811 Ago1) is shown. *D. gallinae* argonaute proteins were identified as orthologues of  
812 Drome Ago1 and are ranked in order of best blast hit to Drome AGO1. Pfam  
813 (<https://pfam.xfam.org>) functional domains include: ArgoN (N-terminal domain of  
814 argonaute, PF16486); ArgoL1 (argonaute linker 1 domain, PF08699); PAZ (PAZ  
815 domain, PF02170); ArgoL2 (argonaute linker 2 domain, PF16488); ArgoMid (mid  
816 domain of argonaute, PF16487); Piwi (Piwi domain, PF02171). Genes located on the  
817 same *D. gallinae* scaffold are highlighted using the superscript letters a-e. The length  
818 of each protein is shown as number of amino acids. No Pfam domains were detected  
819 (nd, none detected) for DEGAL5147g00040.
